# Supplementary material for: Overexpression of UBQLN1 reduces neuropathology in the P497S UBQLN2 mouse model of ALS/FTD
Source: PubMed Central journal article supplement (PMC7539388; doi:10.1186/s40478-020-01039-9), 2020-10-07
Supplement: 40478_2020_1039_MOESM1_ESM.pdf [file 40478_2020_1039_MOESM1_ESM.pdf]

## Supplemental Data

### Tables

Table 1: Behavioral data showing the mean and P values for the different genotypes for the data shown in Fig 3.

Table 2: Means of the frequency and P value comparison of the L4 axon sizes in the different genotypes shown in Fig 8F and G.

### Figures

Fig S1. UBQLN1 overexpression reduces deposition of UBQLN2 inclusions in the brain of P497S mutant mice. (A) Higher magnification images of the dentate gyrus regions of the brain in the different mouse genotypes to better illustrate the deposition and staining of UBQLN2 in the tissues. Scale bar shown. (B) Quantification of the number of UBQLN2 inclusions between 0.0 to 1  $\mu\text{m}$  in size counted in identical size regions of the DG, CA1 and cortex regions (2 males and 1 female for each genotype).  $***P < 0.001$ ,  $****P < 0.0001$ .

Fig S2. UBQLN1 overexpression reduces accumulation of p62 and ubiquitin-positive inclusions in mice expressing the P497S transgene. (A) Confocal images of the dentate gyrus regions (1X and 5X zoomed) of the hippocampus stained for p62, UBQLN2 and DAPI for the different genotypes. (B) Same as A except stained for ubiquitin instead of p62. Scale bars shown.

Fig S3. Detection of MN cells in the SC sections of the different mouse genotypes. SC sections were stained with an anti-ChAT antibody to identify MN in the different mouse genotypes. The MNs identified by ChAT staining directly correlated with the number quantified by cresyl violet staining.

Fig S4. Quantification of the number of myelinated axons in the L4 ventral nerve for male and female mice for the four genotypes. (A) Quantification of all myelinated axons in the L4 nerve in the male mice at 52 weeks of age. (B) Same as A, except for females.

**Table 1: Behavioral Data Showing the Mean and P Values**

| Weight Females | Means  | Means | Means | Means      | P values       | P values        | P values            | P values      | P values          | P values           |
|----------------|--------|-------|-------|------------|----------------|-----------------|---------------------|---------------|-------------------|--------------------|
|                | Non-Tg | UBQ1  | P4975 | UBQ1/P4975 | Non-Tg vs UBQ1 | Non-Tg vs P4975 | Non-Tg vs UB1/P4975 | UBQ1 vs P4975 | UBQ1 vs UB1/P4975 | P4975 vs UB1/P4975 |
| 6 wks          | 16.06  | 15.43 | 14.87 | 14.3       | 0.140137       | 0.007363        | 0.014029            | 0.132891      | 0.060803          | 0.311053           |
| 8 wks          | 17.42  | 16.94 | 16.36 | 15.32      | 0.303487       | 0.015902        | 0.002318            | 0.220527      | 0.027702          | 0.025824           |
| 10 wks         | 18.4   | 17.71 | 17.58 | 16.56      | 0.111564       | 0.053347        | 0.001749            | 0.764553      | 0.05461           | 0.0287             |
| 12 wks         | 19.3   | 18.8  | 18.42 | 17.15      | 0.260856       | 0.079615        | 0.001948            | 0.387628      | 0.004959          | 0.031523           |
| 14 wks         | 20.1   | 19.84 | 18.71 | 17.7       | 0.597506       | 0.006653        | 0.001025            | 0.022694      | 0.002496          | 0.049378           |
| 16 wks         | 20.48  | 20.08 | 19.5  | 18.64      | 0.378303       | 0.050171        | 0.002251            | 0.317635      | 0.035107          | 0.21014            |
| 18 wks         | 20.75  | 20.61 | 19.86 | 19.26      | 0.772766       | 0.051839        | 0.016322            | 0.19218       | 0.087244          | 0.291853           |
| 20 wks         | 21.46  | 21.36 | 20.44 | 19.13      | 0.867621       | 0.054413        | 0.0028              | 0.137774      | 0.013916          | 0.046249           |
| 22 wks         | 21.87  | 21.46 | 20.59 | 19.48      | 0.474263       | 0.023186        | 0.001486            | 0.138826      | 0.009567          | 0.059168           |
| 24 wks         | 22.17  | 21.64 | 21.18 | 19.93      | 0.385745       | 0.085881        | 0.00403             | 0.491417      | 0.056908          | 0.085917           |
| 26 wks         | 22.68  | 22.21 | 21.53 | 19.91      | 0.468221       | 0.08518         | 0.002963            | 0.307884      | 0.009223          | 0.036296           |
| 28 wks         | 23.12  | 22.32 | 21.92 | 20.8       | 0.202126       | 0.067789        | 0.012475            | 0.543319      | 0.092489          | 0.132726           |
| 30 wks         | 23.52  | 22.91 | 21.95 | 20.46      | 0.384275       | 0.031992        | 0.003316            | 0.159236      | 0.007306          | 0.053312           |
| 32 wks         | 23.76  | 23.29 | 22.44 | 20.69      | 0.499289       | 0.044889        | 0.001837            | 0.221047      | 0.011481          | 0.013945           |
| 34 wks         | 24.23  | 23.32 | 22.88 | 21.12      | 0.365867       | 0.152686        | 0.022976            | 0.65497       | 0.09442           | 0.122329           |
| 36 wks         | 24.76  | 23.8  | 22.96 | 21.05      | 0.263572       | 0.045684        | 0.005894            | 0.322724      | 0.018568          | 0.063665           |
| 38 wks         | 24.8   | 24.13 | 23.04 | 21.12      | 0.435193       | 0.049761        | 0.002442            | 0.284615      | 0.027523          | 0.046531           |
| 40 wks         | 25.07  | 24.53 | 22.71 | 21.45      | 0.523804       | 0.029764        | 0.004293            | 0.049563      | 0.00434           | 0.120989           |
| 42 wks         | 25.78  | 25.21 | 24.53 | 21.5       | 0.547588       | 0.245652        | 0.001629            | 0.602322      | 0.021461          | 0.022439           |
| 44 wks         | 25.9   | 24.78 | 24.79 | 21.53      | 0.355521       | 0.417488        | 0.011809            | 0.993867      | 0.036396          | 0.05462            |
| 46 wks         | 26.9   | 26.13 | 24.66 | 21.65      | 0.532056       | 0.103751        | 0.003566            | 0.29088       | 0.008854          | 0.068071           |
| 48 wks         | 27.33  | 26.09 | 25.31 | 21.72      | 0.264691       | 0.15233         | 0.002163            | 0.556558      | 0.00661           | 0.052721           |
| 50 wks         | 27.97  | 26.22 | 26.22 | 21.75      | 0.124294       | 0.203597        | 0.000435            | 0.998069      | 0.007281          | 0.010154           |
| 52 wks         | 28.14  | 26.5  | 24.93 | 21.78      | 0.166191       | 0.02781         | 0.000695            | 0.270751      | 0.006928          | 0.072438           |

  

| Weight Males | Means  | Means | Means | Means      | P values       | P values        | P values            | P values      | P values          | P values           |
|--------------|--------|-------|-------|------------|----------------|-----------------|---------------------|---------------|-------------------|--------------------|
|              | Non-Tg | UBQ1  | P4975 | UBQ1/P4975 | Non-Tg vs UBQ1 | Non-Tg vs P4975 | Non-Tg vs UB1/P4975 | UBQ1 vs P4975 | UBQ1 vs UB1/P4975 | P4975 vs UB1/P4975 |
| 6 wks        | 19.86  | 18.62 | 18.26 | 16.64      | 0.028217       | 0.001466        | 0.000007            | 0.591658      | 0.036835          | 0.046615           |
| 8 wks        | 21.94  | 20.96 | 20.77 | 19.92      | 0.128235       | 0.065432        | 0.008906            | 0.807525      | 0.26429           | 0.344285           |
| 10 wks       | 23.61  | 23.01 | 22.41 | 21.45      | 0.354408       | 0.087613        | 0.020016            | 0.3898        | 0.063135          | 0.319343           |
| 12 wks       | 25.08  | 24.27 | 23.59 | 22.73      | 0.253814       | 0.070394        | 0.021599            | 0.345764      | 0.055515          | 0.402924           |
| 14 wks       | 26.7   | 25.25 | 24.81 | 24.18      | 0.083131       | 0.027608        | 0.027756            | 0.549977      | 0.227102          | 0.522356           |
| 16 wks       | 27.1   | 26.41 | 26.02 | 25.02      | 0.384989       | 0.177964        | 0.055145            | 0.603418      | 0.124162          | 0.297335           |
| 18 wks       | 28.07  | 27.26 | 26.86 | 25.52      | 0.317496       | 0.158273        | 0.024039            | 0.605366      | 0.042923          | 0.195558           |
| 20 wks       | 28.46  | 27.79 | 27.06 | 26.15      | 0.473171       | 0.113901        | 0.073994            | 0.402695      | 0.178854          | 0.445794           |
| 22 wks       | 29.32  | 28.44 | 27.76 | 27.02      | 0.346632       | 0.098           | 0.085762            | 0.388273      | 0.172627          | 0.506185           |
| 24 wks       | 30.29  | 29.11 | 28.36 | 27.23      | 0.21537        | 0.033012        | 0.019241            | 0.36017       | 0.100516          | 0.303476           |
| 26 wks       | 30.87  | 30.06 | 28.38 | 27.8       | 0.453342       | 0.018925        | 0.055598            | 0.06597       | 0.09929           | 0.632847           |
| 28 wks       | 31.35  | 30.61 | 29.03 | 28.48      | 0.46479        | 0.026037        | 0.066294            | 0.074632      | 0.111381          | 0.678877           |
| 30 wks       | 31.94  | 29.99 | 29.41 | 28.5       | 0.075297       | 0.005106        | 0.015262            | 0.562203      | 0.353343          | 0.447047           |
| 32 wks       | 32.5   | 31.22 | 29.5  | 29.3       | 0.214819       | 0.003046        | 0.041972            | 0.05013       | 0.163193          | 0.868273           |
| 34 wks       | 33.07  | 30.8  | 30.57 | 29.4       | 0.085675       | 0.056601        | 0.034               | 0.857975      | 0.401611          | 0.40513            |
| 36 wks       | 33.15  | 32.82 | 30.02 | 29.09      | 0.796776       | 0.008764        | 0.021094            | 0.016312      | 0.026018          | 0.491561           |
| 38 wks       | 33.85  | 32.76 | 30.1  | 29.53      | 0.381825       | 0.001253        | 0.009679            | 0.03101       | 0.062646          | 0.681672           |
| 40 wks       | 34.51  | 33.04 | 29.86 | 29.84      | 0.272016       | 0.000511        | 0.009443            | 0.01919       | 0.080801          | 0.987672           |
| 42 wks       | 34.82  | 32.97 | 29.96 | 30.39      | 0.212919       | 0.000259        | 0.017528            | 0.036932      | 0.214036          | 0.769285           |
| 44 wks       | 35.92  | 34    | 31.51 | 30.5       | 0.198154       | 0.005431        | 0.009001            | 0.126551      | 0.082839          | 0.626284           |
| 46 wks       | 35.53  | 34.72 | 31.28 | 30.55      | 0.596918       | 0.007916        | 0.01443             | 0.038549      | 0.046496          | 0.719955           |
| 48 wks       | 36.77  | 35.09 | 31.51 | 30.38      | 0.284313       | 0.000772        | 0.002364            | 0.032722      | 0.036858          | 0.504615           |
| 50 wks       | 36.76  | 35.62 | 32.61 | 30.74      | 0.477334       | 0.010011        | 0.003012            | 0.109717      | 0.038594          | 0.326233           |
| 52 wks       | 37.8   | 35.85 | 31.96 | 31.05      | 0.261303       | 0.001633        | 0.002713            | 0.071361      | 0.068805          | 0.663055           |

  

| Rotarod Females | Means  | Means | Means | Means      | P values       | P values        | P values            | P values      | P values          | P values           |
|-----------------|--------|-------|-------|------------|----------------|-----------------|---------------------|---------------|-------------------|--------------------|
|                 | Non-Tg | UBQ1  | P4975 | UBQ1/P4975 | Non-Tg vs UBQ1 | Non-Tg vs P4975 | Non-Tg vs UB1/P4975 | UBQ1 vs P4975 | UBQ1 vs UB1/P4975 | P4975 vs UB1/P4975 |
| 6 wks           | 146.8  | 153.4 | 162   | 185        | 0.5301         | 0.112726        | 0.012549            | 0.453824      | 0.07767           | 0.151848           |
| 8 wks           | 144.6  | 135.8 | 161.4 | 151.2      | 0.382294       | 0.197245        | 0.706993            | 0.121671      | 0.462621          | 0.699991           |
| 10 wks          | 128.7  | 144.3 | 135.8 | 144.7      | 0.140925       | 0.576742        | 0.239558            | 0.600696      | 0.981522          | 0.695981           |
| 12 wks          | 135.1  | 140.1 | 146.1 | 122.7      | 0.614835       | 0.330042        | 0.345429            | 0.62571       | 0.126827          | 0.166255           |
| 14 wks          | 128.6  | 138.6 | 143.6 | 119.6      | 0.276864       | 0.272591        | 0.520597            | 0.744844      | 0.117246          | 0.335806           |
| 16 wks          | 134    | 140.6 | 154.4 | 115.8      | 0.491475       | 0.07307         | 0.20062             | 0.269313      | 0.078977          | 0.04568            |
| 18 wks          | 133.5  | 148.2 | 152.9 | 118.2      | 0.094849       | 0.062547        | 0.248069            | 0.669014      | 0.01704           | 0.056428           |
| 20 wks          | 144.3  | 130.3 | 139.3 | 150.2      | 0.242605       | 0.680598        | 0.741012            | 0.509853      | 0.283697          | 0.6037             |
| 22 wks          | 140.3  | 137.8 | 136.9 | 105.3      | 0.806037       | 0.784614        | 0.027848            | 0.949567      | 0.045775          | 0.1561             |
| 24 wks          | 145.5  | 136.8 | 151.4 | 109.4      | 0.394747       | 0.6227          | 0.031021            | 0.226895      | 0.021647          | 0.036585           |
| 26 wks          | 135.4  | 124.8 | 140.3 | 105.2      | 0.354365       | 0.598641        | 0.099651            | 0.086516      | 0.288593          | 0.014614           |
| 28 wks          | 133.7  | 134.6 | 144.1 | 128.8      | 0.935412       | 0.406053        | 0.766369            | 0.487314      | 0.692107          | 0.468929           |
| 30 wks          | 135.5  | 114.2 | 137.3 | 110.6      | 0.06271        | 0.875361        | 0.178925            | 0.046483      | 0.806972          | 0.15791            |
| 32 wks          | 137.6  | 125.9 | 132.7 | 114.6      | 0.306136       | 0.684076        | 0.204743            | 0.615967      | 0.529412          | 0.399941           |
| 34 wks          | 124.1  | 117.5 | 123.3 | 99         | 0.541425       | 0.943334        | 0.20046             | 0.637703      | 0.324866          | 0.282871           |
| 36 wks          | 131.6  | 111   | 129.1 | 114        | 0.046653       | 0.864173        | 0.293183            | 0.299881      | 0.848218          | 0.619248           |
| 38 wks          | 128.2  | 112.1 | 128.9 | 99.25      | 0.098607       | 0.951978        | 0.100512            | 0.208153      | 0.472016          | 0.22993            |
| 40 wks          | 134.9  | 123.6 | 141.6 | 112.3      | 0.25529        | 0.568199        | 0.146631            | 0.250104      | 0.575861          | 0.247368           |
| 42 wks          | 127.6  | 105.6 | 128.8 | 100        | 0.013531       | 0.932816        | 0.12211             | 0.072917      | 0.783049          | 0.27445            |
| 44 wks          | 130.9  | 125.5 | 136.6 | 96.25      | 0.596069       | 0.624487        | 0.042799            | 0.325039      | 0.029649          | 0.036566           |
| 46 wks          | 124.3  | 121.2 | 138.3 | 100.3      | 0.788032       | 0.313793        | 0.244557            | 0.236428      | 0.270261          | 0.159853           |
| 48 wks          | 118.9  | 115.5 | 110.5 | 98.75      | 0.750158       | 0.456382        | 0.224775            | 0.709644      | 0.384739          | 0.509091           |
| 50 wks          | 116.8  | 106.9 | 118.9 | 83         | 0.359364       | 0.849815        | 0.059811            | 0.288765      | 0.177399          | 0.037888           |
| 52 wks          | 122.8  | 106.2 | 108   | 104        | 0.07925        | 0.244346        | 0.148485            | 0.912944      | 0.906435          | 0.881471           |

  

| Rotarod Males | Means  | Means | Means | Means      | P values       | P values        | P values            | P values      | P values          | P values           |
|---------------|--------|-------|-------|------------|----------------|-----------------|---------------------|---------------|-------------------|--------------------|
|               | Non-Tg | UBQ1  | P4975 | UBQ1/P4975 | Non-Tg vs UBQ1 | Non-Tg vs P4975 | Non-Tg vs UB1/P4975 | UBQ1 vs P4975 | UBQ1 vs UB1/P4975 | P4975 vs UB1/P4975 |
| 6 wks         | 129.6  | 149.5 | 134   | 163.3      | 0.055674       | 0.698694        | 0.003487            | 0.281167      | 0.29072           | 0.053624           |
| 8 wks         | 140.4  | 128.3 | 167.4 | 124.3      | 0.398738       | 0.066229        | 0.322796            | 0.014506      | 0.796605          | 0.016105           |
| 10 wks        | 149.8  | 128.8 | 159.7 | 112.9      | 0.040631       | 0.415027        | 0.002397            | 0.023757      | 0.097464          | 0.002757           |
| 12 wks        | 155.3  | 133.2 | 145.5 | 119.3      | 0.106372       | 0.489981        | 0.015938            | 0.386753      | 0.283624          | 0.087134           |
| 14 wks        | 156.8  | 127.8 | 136.4 | 124.3      | 0.026334       | 0.06938         | 0.027308            | 0.477905      | 0.818295          | 0.375153           |
| 16 wks        | 152.2  | 123.4 | 147.4 | 130        | 0.008925       | 0.651028        | 0.074764            | 0.033379      | 0.563064          | 0.1706             |
| 18 wks        | 155.5  | 133.8 | 160.3 | 118        | 0.075657       | 0.73621         | 0.005597            | 0.097372      | 0.14223           | 0.01574            |
| 20 wks        | 138.4  | 129.7 | 143.4 | 117.2      | 0.473519       | 0.741456        | 0.18406             | 0.429261      | 0.372081          | 0.200695           |
| 22 wks        | 145.1  | 124.4 | 136.6 | 122.3      | 0.096179       | 0.552314        | 0.141049            | 0.421502      | 0.881124          | 0.422088           |
| 24 wks        | 145.5  | 124.7 | 144.6 | 129.6      | 0.172477       | 0.944246        | 0.23799             | 0.250713      | 0.777402          | 0.335337           |
| 26 wks        | 150.1  | 132.3 | 137.1 | 118.2      | 0.246513       | 0.242749        | 0.058572            | 0.709178      | 0.462142          | 0.176923           |
| 28 wks        | 143.9  | 122.5 | 136.3 | 111.4      | 0.090566       | 0.521074        | 0.014821            | 0.358848      | 0.295604          | 0.118068           |
| 30 wks        | 134.9  | 129.6 | 135.8 | 115        | 0.672075       | 0.903073        | 0.077945            | 0.615627      | 0.413048          | 0.068008           |
| 32 wks        | 134.5  | 119.6 | 129.8 | 113.7      | 0.357441       | 0.405112        | 0.201964            | 0.785344      | 0.7433            | 0.513348           |
| 34 wks        | 134.8  | 101.1 | 113.6 | 101.3      | 0.0            |                 |                     |               |                   |                    |

|        |       |       |       |       |          |          |          |          |          |          |
|--------|-------|-------|-------|-------|----------|----------|----------|----------|----------|----------|
| 40 wks | 123.3 | 124.1 | 109.6 | 107.8 | 0.939166 | 0.128765 | 0.271931 | 0.211893 | 0.381162 | 0.9022   |
| 42 wks | 114.2 | 131.6 | 99.36 | 105.8 | 0.237267 | 0.270074 | 0.441243 | 0.157656 | 0.201159 | 0.730512 |
| 44 wks | 116.5 | 110.3 | 99.43 | 121.3 | 0.652898 | 0.112518 | 0.783873 | 0.351384 | 0.597984 | 0.171098 |
| 46 wks | 115.5 | 117.7 | 90.21 | 124.7 | 0.912445 | 0.09135  | 0.629237 | 0.19158  | 0.804397 | 0.097603 |
| 48 wks | 111.2 | 94    | 96.08 | 95.83 | 0.19321  | 0.316082 | 0.313085 | 0.913324 | 0.915496 | 0.990912 |
| 50 wks | 102.2 | 96.57 | 76    | 127.5 | 0.756409 | 0.302007 | 0.199913 | 0.42958  | 0.092114 | 0.080298 |
| 52 wks | 101.8 | 110.6 | 75.4  | 107.7 | 0.403834 | 0.075369 | 0.639276 | 0.080506 | 0.857123 | 0.151311 |

| Gripstrength<br>Females | Means  | Means | Means | Means      | P values       | P values        | P values            | P values      | P values          | P values           |
|-------------------------|--------|-------|-------|------------|----------------|-----------------|---------------------|---------------|-------------------|--------------------|
|                         | Non-Tg | UBQ1  | P4975 | UBQ1/P4975 | Non-Tg vs UBQ1 | Non-Tg vs P4975 | Non-Tg vs UB1/P4975 | UBQ1 vs P4975 | UBQ1 vs UB1/P4975 | P4975 vs UB1/P4975 |
| 6 wks                   | 541.3  | 564.1 | 414.9 | 391.5      | 0.648694       | 0.018006        | 0.06625             | 0.005369      | 0.025785          | 0.761974           |
| 8 wks                   | 599.5  | 546.6 | 533.2 | 482.5      | 0.203752       | 0.124995        | 0.064723            | 0.766687      | 0.30871           | 0.445176           |
| 10 wks                  | 634    | 636.9 | 535.5 | 514.8      | 0.944178       | 0.024569        | 0.043689            | 0.027772      | 0.045548          | 0.720297           |
| 12 wks                  | 619    | 638.7 | 510.2 | 566.6      | 0.661993       | 0.026977        | 0.247053            | 0.044913      | 0.297972          | 0.442372           |
| 14 wks                  | 616.5  | 662.8 | 616.5 | 616.7      | 0.290321       | 0.999613        | 0.997263            | 0.231226      | 0.417617          | 0.997138           |
| 16 wks                  | 605.6  | 581.4 | 499.8 | 574.5      | 0.59375        | 0.052688        | 0.601317            | 0.162387      | 0.908088          | 0.335915           |
| 18 wks                  | 606.9  | 604.6 | 511.9 | 654.5      | 0.962483       | 0.067021        | 0.421746            | 0.119197      | 0.458011          | 0.044115           |
| 20 wks                  | 666    | 656.3 | 525.1 | 606.4      | 0.804103       | 0.00091         | 0.219773            | 0.007763      | 0.36324           | 0.151664           |
| 22 wks                  | 621    | 625.6 | 586.4 | 527        | 0.926012       | 0.522665        | 0.145047            | 0.495376      | 0.115794          | 0.412852           |
| 24 wks                  | 675.6  | 663   | 652.2 | 685.9      | 0.757265       | 0.575625        | 0.856377            | 0.822021      | 0.730964          | 0.623247           |
| 26 wks                  | 666.3  | 666.3 | 611.3 | 561.6      | 0.99918        | 0.175571        | 0.036546            | 0.240718      | 0.072026          | 0.464253           |
| 28 wks                  | 629.7  | 661.7 | 528.1 | 632.1      | 0.371582       | 0.044744        | 0.964916            | 0.011469      | 0.566993          | 0.204275           |
| 30 wks                  | 646.9  | 697.4 | 577.3 | 566.6      | 0.172404       | 0.06832         | 0.159553            | 0.00359       | 0.0289            | 0.852952           |
| 32 wks                  | 636.5  | 658.7 | 592.4 | 571.7      | 0.625315       | 0.365007        | 0.328814            | 0.243536      | 0.258204          | 0.801695           |
| 34 wks                  | 714.7  | 624.4 | 573.6 | 563        | 0.060794       | 0.018721        | 0.011766            | 0.498854      | 0.436624          | 0.918361           |
| 36 wks                  | 657.2  | 682.8 | 542.6 | 567.8      | 0.561127       | 0.023075        | 0.150085            | 0.017865      | 0.113014          | 0.750521           |
| 38 wks                  | 661    | 608.6 | 664.5 | 586.8      | 0.231424       | 0.945716        | 0.255072            | 0.286764      | 0.713575          | 0.291142           |
| 40 wks                  | 704.5  | 703.2 | 588.5 | 605.3      | 0.976634       | 0.031339        | 0.130124            | 0.064942      | 0.181742          | 0.838982           |
| 42 wks                  | 703.4  | 654   | 611   | 597.2      | 0.224326       | 0.045566        | 0.06084             | 0.461642      | 0.445167          | 0.862985           |
| 44 wks                  | 713.8  | 668.1 | 652.6 | 578.8      | 0.361803       | 0.222441        | 0.05373             | 0.799525      | 0.293284          | 0.374764           |
| 46 wks                  | 700.8  | 669   | 641   | 577.7      | 0.429138       | 0.172057        | 0.02824             | 0.606629      | 0.189188          | 0.395645           |
| 48 wks                  | 711.6  | 721.1 | 529.9 | 545.8      | 0.798549       | 0.000175        | 0.003728            | 0.001326      | 0.01417           | 0.842906           |
| 50 wks                  | 755.3  | 718.9 | 564.6 | 545.8      | 0.376297       | 0.00004         | 0.003576            | 0.001604      | 0.031722          | 0.799451           |
| 52 wks                  | 722.7  | 678.6 | 603.6 | 479.3      | 0.246522       | 0.023655        | 0.000057            | 0.212331      | 0.003133          | 0.155022           |

| Gripstrength<br>Males | Means  | Means | Means | Means      | P values       | P values        | P values            | P values      | P values          | P values           |
|-----------------------|--------|-------|-------|------------|----------------|-----------------|---------------------|---------------|-------------------|--------------------|
|                       | Non-Tg | UBQ1  | P4975 | UBQ1/P4975 | Non-Tg vs UBQ1 | Non-Tg vs P4975 | Non-Tg vs UB1/P4975 | UBQ1 vs P4975 | UBQ1 vs UB1/P4975 | P4975 vs UB1/P4975 |
| 6 wks                 | 657.3  | 557.3 | 498.3 | 449.3      | 0.007408       | 0.00079         | 0.000805            | 0.263924      | 0.130755          | 0.570303           |
| 8 wks                 | 639.8  | 676.5 | 614.3 | 533.6      | 0.292623       | 0.491032        | 0.053832            | 0.120146      | 0.017291          | 0.189258           |
| 10 wks                | 686.9  | 710.5 | 638   | 585.8      | 0.492561       | 0.222053        | 0.073703            | 0.067788      | 0.021839          | 0.409846           |
| 12 wks                | 706.8  | 677.8 | 653.7 | 624.5      | 0.400398       | 0.199324        | 0.124771            | 0.539722      | 0.282847          | 0.628803           |
| 14 wks                | 713.2  | 691.4 | 657.8 | 670.1      | 0.592944       | 0.112068        | 0.399272            | 0.469656      | 0.766167          | 0.831605           |
| 16 wks                | 725.5  | 674.6 | 678.2 | 661.1      | 0.193232       | 0.176827        | 0.239581            | 0.929903      | 0.835608          | 0.758881           |
| 18 wks                | 669.4  | 649   | 701.5 | 684.8      | 0.569453       | 0.368935        | 0.762257            | 0.162428      | 0.499286          | 0.741872           |
| 20 wks                | 707.5  | 643.8 | 648.7 | 678.8      | 0.085677       | 0.045569        | 0.5813              | 0.893545      | 0.590077          | 0.558786           |
| 22 wks                | 715.1  | 677.9 | 609.9 | 653.9      | 0.287202       | 0.020078        | 0.206226            | 0.131433      | 0.594411          | 0.507089           |
| 24 wks                | 676.1  | 717.8 | 627.7 | 699.4      | 0.175073       | 0.125636        | 0.567261            | 0.017638      | 0.713195          | 0.171068           |
| 26 wks                | 724.5  | 718.5 | 701.6 | 661.4      | 0.874624       | 0.532122        | 0.14827             | 0.698924      | 0.280738          | 0.42193            |
| 28 wks                | 755    | 691.2 | 682.6 | 699.5      | 0.098275       | 0.10004         | 0.241294            | 0.866636      | 0.870292          | 0.796067           |
| 30 wks                | 691.2  | 681.4 | 703.8 | 671        | 0.785646       | 0.684701        | 0.62997             | 0.565985      | 0.844716          | 0.42881            |
| 32 wks                | 716.6  | 710.9 | 720.6 | 667.8      | 0.861362       | 0.889493        | 0.296115            | 0.756922      | 0.392843          | 0.226227           |
| 34 wks                | 791    | 696.2 | 651.4 | 680.4      | 0.048374       | 0.005547        | 0.013433            | 0.510602      | 0.82544           | 0.686891           |
| 36 wks                | 742.4  | 702.9 | 682   | 730.1      | 0.285783       | 0.133394        | 0.78475             | 0.654703      | 0.594209          | 0.425706           |
| 38 wks                | 810.4  | 691.4 | 634.4 | 671.3      | 0.001972       | 0.000034        | 0.00202             | 0.311007      | 0.77731           | 0.625343           |
| 40 wks                | 727.3  | 698.9 | 652.1 | 664.1      | 0.51106        | 0.030605        | 0.191106            | 0.293967      | 0.587095          | 0.78588            |
| 42 wks                | 759.6  | 776.3 | 643.8 | 671.3      | 0.589079       | 0.017723        | 0.078956            | 0.019298      | 0.046114          | 0.730071           |
| 44 wks                | 776.1  | 774.4 | 635.8 | 685.6      | 0.95109        | 0.000307        | 0.035688            | 0.001916      | 0.067881          | 0.432666           |
| 46 wks                | 769.4  | 762.5 | 597.2 | 691.1      | 0.829353       | 0.000065        | 0.112784            | 0.001197      | 0.230008          | 0.196981           |
| 48 wks                | 775.2  | 750.9 | 640.4 | 680.3      | 0.437625       | 0.001722        | 0.032464            | 0.02509       | 0.162227          | 0.560757           |
| 50 wks                | 742.9  | 738.7 | 597.4 | 700.1      | 0.90895        | 0.005038        | 0.368536            | 0.013837      | 0.447695          | 0.150791           |
| 52 wks                | 763.5  | 736.8 | 617.9 | 678.9      | 0.527953       | 0.006874        | 0.091841            | 0.078765      | 0.382129          | 0.446412           |

P<0.05 is highlighted in yellow

**Table 2: Means of the frequency and P value comparison of the L4 axon sizes in the different genotypes**

| L4      | Bins | Means  | Means | Means  | Means      | P values       | P values        | P values            | P values      | P values          | P values           |
|---------|------|--------|-------|--------|------------|----------------|-----------------|---------------------|---------------|-------------------|--------------------|
|         |      | Non-Tg | UBQ1  | P4975  | UBQ1/P4975 | Non-Tg vs UBQ1 | Non-Tg vs P4975 | Non-Tg vs UB1/P4975 | UBQ1 vs P4975 | UBQ1 vs UB1/P4975 | P4975 vs UB1/P4975 |
| Females | 0    | 0      | 0     | 0      | 0          | 0              | 0               | 0                   | 0             | 0                 | 0                  |
|         | 5    | 2.333  | 19.33 | 52     | 21.33      | 0.150267       | 0.003775        | 0.001286            | 0.042561      | 0.847875          | 0.038221           |
|         | 10   | 41.67  | 86.67 | 106.3  | 105        | 0.065176       | 0.006614        | 0.000043            | 0.370844      | 0.367418          | 0.944329           |
|         | 15   | 44.33  | 60    | 56.71  | 77.67      | 0.058848       | 0.471999        | 0.01881             | 0.845104      | 0.093754          | 0.24552            |
|         | 20   | 27     | 26.33 | 25.43  | 44.67      | 0.928544       | 0.834625        | 0.125794            | 0.902513      | 0.107414          | 0.042497           |
|         | 25   | 18.33  | 19.33 | 18.86  | 23.67      | 0.852837       | 0.933057        | 0.508985            | 0.934241      | 0.528707          | 0.476779           |
|         | 30   | 13     | 15.33 | 19.71  | 22.67      | 0.449855       | 0.319884        | 0.30024             | 0.496718      | 0.396988          | 0.710014           |
|         | 35   | 11     | 12.67 | 20.57  | 25         | 0.673011       | 0.209323        | 0.14329             | 0.280135      | 0.162726          | 0.592029           |
|         | 40   | 9.333  | 16.33 | 19.86  | 20.33      | 0.122985       | 0.077934        | 0.222862            | 0.542461      | 0.653508          | 0.946258           |
|         | 45   | 12     | 17    | 22.29  | 31.33      | 0.138571       | 0.129795        | 0.185371            | 0.407941      | 0.299896          | 0.358655           |
|         | 50   | 16     | 21    | 21.14  | 19         | 0.352882       | 0.392872        | 0.666276            | 0.979437      | 0.740233          | 0.72895            |
|         | 55   | 13.33  | 26    | 23     | 23         | 0.026965       | 0.005765        | 0.231797            | 0.393597      | 0.716776          | >0.999999          |
|         | 60   | 16     | 30.33 | 22.57  | 25         | 0.041544       | 0.205331        | 0.166136            | 0.18223       | 0.465395          | 0.669139           |
|         | 65   | 18.33  | 30.67 | 20.57  | 20.67      | 0.292215       | 0.589473        | 0.664339            | 0.183181      | 0.403658          | 0.983491           |
|         | 70   | 23.67  | 33.67 | 21.43  | 20.33      | 0.122558       | 0.214894        | 0.369564            | 0.007004      | 0.089009          | 0.66904            |
|         | 75   | 21     | 34    | 19.86  | 26.33      | 0.235092       | 0.736588        | 0.303548            | 0.048996      | 0.474302          | 0.116484           |
|         | 80   | 29.33  | 24.67 | 18.43  | 21.33      | 0.448352       | 0.045414        | 0.204379            | 0.212617      | 0.562184          | 0.535606           |
|         | 85   | 28.33  | 26.67 | 17.86  | 21         | 0.769407       | 0.0704          | 0.275589            | 0.059799      | 0.122952          | 0.481722           |
|         | 90   | 31     | 25.67 | 14.43  | 14         | 0.519288       | 0.004897        | 0.0422              | 0.026944      | 0.099315          | 0.888655           |
|         | 95   | 32     | 20.33 | 11.57  | 15.33      | 0.009176       | 0.000053        | 0.053447            | 0.007141      | 0.446944          | 0.391977           |
|         | 100  | 31.67  | 10    | 8.714  | 9.667      | 0.00289        | 0.000012        | 0.012139            | 0.579839      | 0.948049          | 0.772333           |
|         | 105  | 27     | 16.33 | 5.429  | 8.667      | 0.021379       | 0.000009        | 0.00195             | 0.000991      | 0.0037166         | 0.141961           |
|         | 110  | 15.33  | 11.67 | 6.429  | 7.667      | 0.57695        | 0.015611        | 0.176622            | 0.099011      | 0.423997          | 0.468071           |
|         | 115  | 21.33  | 9.333 | 4.714  | 6.667      | 0.090627       | 0.000301        | 0.024886            | 0.195994      | 0.632124          | 0.467552           |
|         | 120  | 16     | 4.333 | 4.143  | 6.667      | 0.04781        | 0.001289        | 0.082794            | 0.919134      | 0.477587          | 0.187515           |
|         | 125  | 17     | 7     | 3.429  | 6          | 0.177048       | 0.000116        | 0.049864            | 0.343846      | 0.882512          | 0.277216           |
|         | 130  | 8.333  | 4.333 | 1.429  | 4.667      | 0.292144       | 0.002454        | 0.234932            | 0.10482       | 0.905069          | 0.014761           |
|         | 135  | 8.333  | 1.333 | 2.429  | 2.333      | 0.126531       | 0.022975        | 0.17851             | 0.299588      | 0.638768          | 0.929691           |
|         | 140  | 6      | 2     | 1.571  | 3          | 0.306569       | 0.055497        | 0.40352             | 0.727646      | 0.613011          | 0.177898           |
|         | 145  | 5.333  | 3.667 | 1.286  | 3.667      | 0.658429       | 0.004544        | 0.462807            | 0.264326      | >0.999999         | 0.050933           |
|         | 150  | 4.667  | 2.333 | 1.571  | 2          | 0.390739       | 0.013919        | 0.116117            | 0.658758      | 0.904299          | 0.716              |
|         | 155  | 3      | 2.667 | 0.7143 | 3          | 0.859308       | 0.008858        | >0.999999           | 0.127084      | 0.889917          | 0.066258           |
|         | 160  | 3      | 2.667 | 0.7143 | 1.667      | 0.908657       | 0.003836        | 0.373901            | 0.272397      | 0.749647          | 0.294236           |
| L4      |      |        |       |        |            |                |                 |                     |               |                   |                    |
| Males   | 0    | 0      | 0     | 0      | 0          | 0              | 0               | 0                   | 0             | 0                 | 0                  |
|         | 5    | 10     | 39    | 33.33  | 25.67      | 0.150405       | 0.268188        | 0.161482            | 0.8231        | 0.495851          | 0.714362           |
|         | 10   | 71.33  | 106.7 | 53     | 118        | 0.302901       | 0.586701        | 0.16736             | 0.111447      | 0.638204          | 0.052544           |
|         | 15   | 59     | 48.33 | 38.33  | 85.67      | 0.334769       | 0.179521        | 0.124744            | 0.383463      | 0.031473          | 0.028476           |
|         | 20   | 34.67  | 22.67 | 23.33  | 37         | 0.139677       | 0.167209        | 0.748436            | 0.741521      | 0.002445          | 0.006862           |
|         | 25   | 19     | 12.67 | 20.67  | 24.67      | 0.233907       | 0.731102        | 0.210224            | 0.117955      | 0.019891          | 0.279083           |
|         | 30   | 12.67  | 9.333 | 18.33  | 22         | 0.262865       | 0.21587         | 0.014513            | 0.113747      | 0.016354          | 0.441348           |
|         | 35   | 6.333  | 6.667 | 20.33  | 27.67      | 0.900148       | 0.049431        | 0.003291            | 0.037494      | 0.00109           | 0.21802            |
|         | 40   | 11     | 12    | 17.67  | 29.67      | 0.629095       | 0.214384        | 0.0001              | 0.288222      | 0.00035           | 0.052065           |
|         | 45   | 13.67  | 8.333 | 22.33  | 33.33      | 0.364474       | 0.268454        | 0.049125            | 0.047575      | 0.009459          | 0.183458           |
|         | 50   | 16     | 8     | 19     | 32.67      | 0.076291       | 0.665047        | 0.010905            | 0.12373       | 0.000305          | 0.080371           |
|         | 55   | 12.67  | 13.33 | 19.67  | 30.33      | 0.916365       | 0.367478        | 0.045464            | 0.327045      | 0.023178          | 0.143784           |
|         | 60   | 15     | 17    | 17     | 21.67      | 0.71826        | 0.760854        | 0.189004            | >0.999999     | 0.245492          | 0.383537           |
|         | 65   | 19     | 21    | 23     | 21.67      | 0.841301       | 0.68957         | 0.799416            | 0.555073      | 0.887147          | 0.771715           |
|         | 70   | 19.33  | 25.67 | 18.67  | 21.33      | 0.485966       | 0.929105        | 0.787846            | 0.267335      | 0.460461          | 0.436975           |
|         | 75   | 28.33  | 24.67 | 19.67  | 13.33      | 0.798637       | 0.544719        | 0.313919            | 0.278008      | 0.038363          | 0.045728           |
|         | 80   | 26.33  | 23.67 | 13.67  | 16         | 0.787038       | 0.226983        | 0.313449            | 0.023579      | 0.067146          | 0.256435           |
|         | 85   | 33     | 19.33 | 13     | 14         | 0.113507       | 0.05198         | 0.046229            | 0.155181      | 0.058163          | 0.784257           |
|         | 90   | 35     | 23.67 | 8      | 9.333      | 0.110583       | 0.006824        | 0.007706            | 0.004936      | 0.005467          | 0.530412           |
|         | 95   | 24.33  | 19    | 4.667  | 13.67      | 0.064677       | 0.000771        | 0.073388            | 0.0044        | 0.310293          | 0.122443           |
|         | 100  | 32.67  | 19    | 9.333  | 7.333      | 0.06148        | 0.009468        | 0.005331            | 0.065733      | 0.024896          | 0.515752           |
|         | 105  | 21.67  | 17.33 | 5.667  | 8.333      | 0.667942       | 0.000876        | 0.011056            | 0.274142      | 0.397819          | 0.333516           |
|         | 110  | 21     | 15    | 5      | 6.667      | 0.369889       | 0.015024        | 0.040678            | 0.114346      | 0.217294          | 0.661225           |
|         | 115  | 18     | 16.33 | 6.667  | 6.333      | 0.844882       | 0.054775        | 0.04515             | 0.238988      | 0.220636          | 0.802482           |
|         | 120  | 16.33  | 8.667 | 4      | 2          | 0.208696       | 0.032641        | 0.018124            | 0.27206       | 0.131778          | 0.116117           |
|         | 125  | 11.33  | 10.67 | 2      | 3          | 0.889319       | 0.042592        | 0.058755            | 0.052685      | 0.073471          | 0.467605           |
|         | 130  | 16     | 4     | 2.333  | 3.333      | 0.020243       | 0.006862        | 0.008971            | 0.488251      | 0.77558           | 0.066767           |
|         | 135  | 12.67  | 3.667 | 2      | 2          | 0.034892       | 0.021379        | 0.021379            | 0.066767      | >0.999999         | 0.724659           |
|         | 140  | 5.333  | 4.667 | 1.667  | 2          | 0.802482       | 0.08352         | 0.099982            | 0.232566      | 0.274577          | 0.250815           |
|         | 145  | 9      | 3.333 | 1.667  | 0.6667     | 0.077877       | 0.037997        | 0.023346            | 0.151835      | 0.023215          | 0.435331           |
|         | 150  | 4.667  | 2.333 | 2      | 3          | 0.364956       | 0.224122        | 0.457253            | 0.841596      | 0.724659          | 0.421648           |
|         | 155  | 4.667  | 2.667 | 1.333  | 0.6667     | 0.416866       | 0.180077        | 0.134196            | 0.2302        | 0.144704          | 0.025721           |
|         | 160  | 4.333  | 1     | 0      | 2          | 0.131778       | 0.069934        | 0.277069            | 0.158302      | 0.025721          | 0.025721           |

P<0.05 is highlighted in yellow

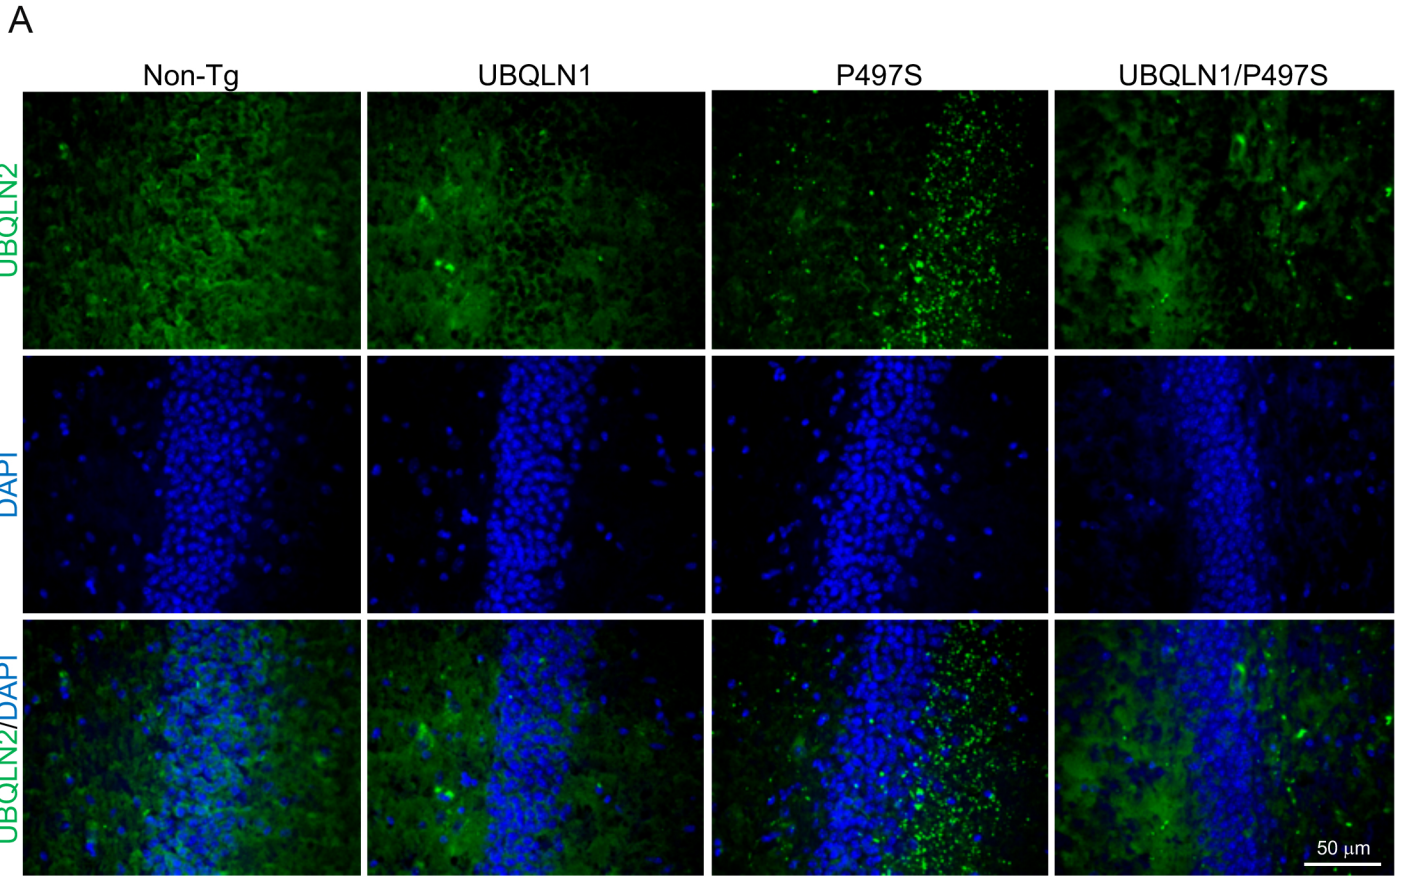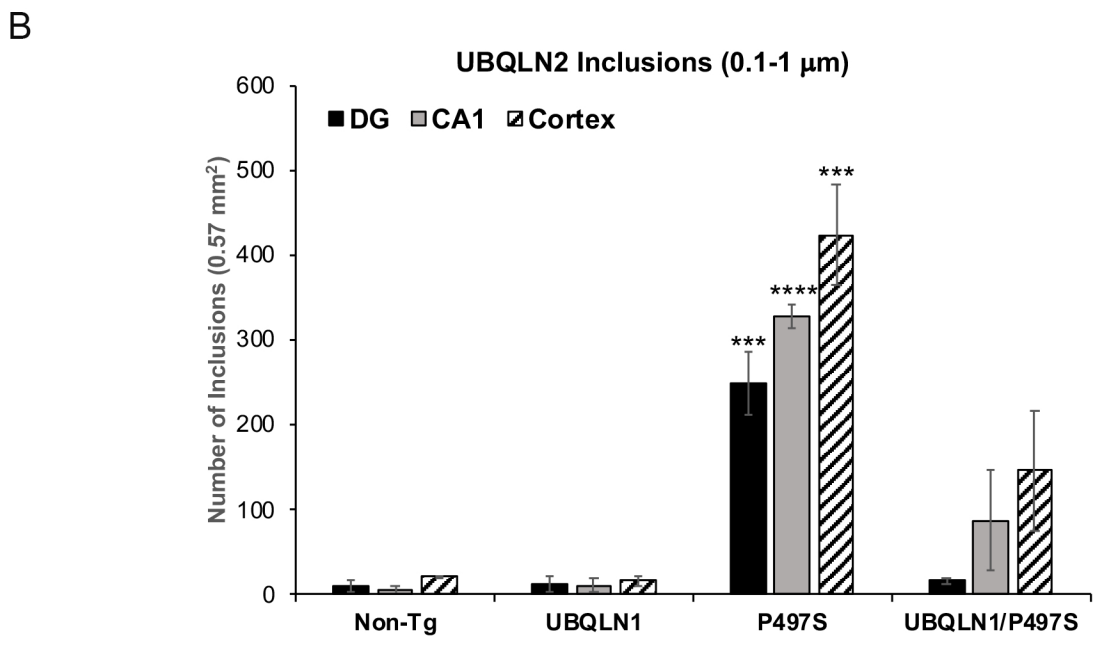

Fig S1

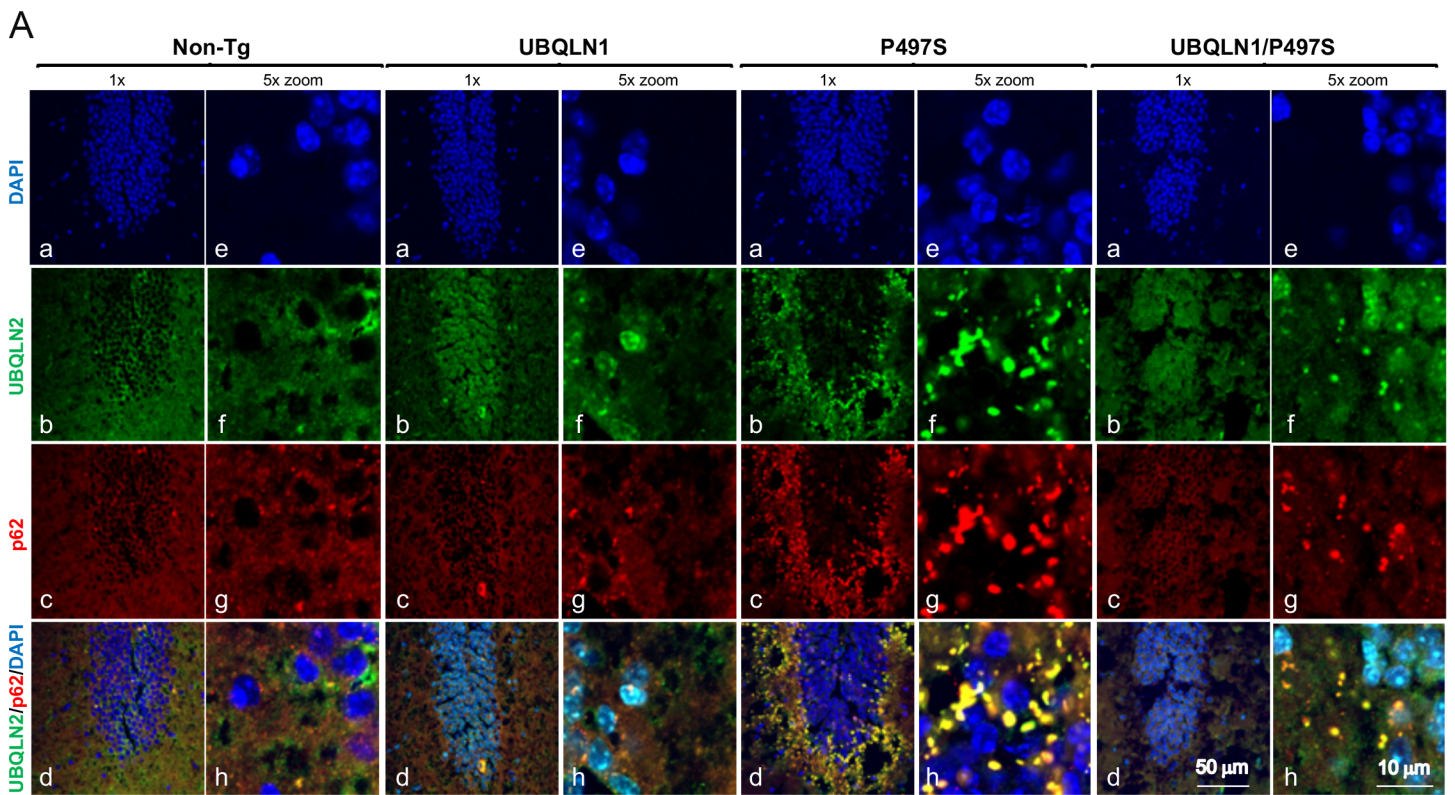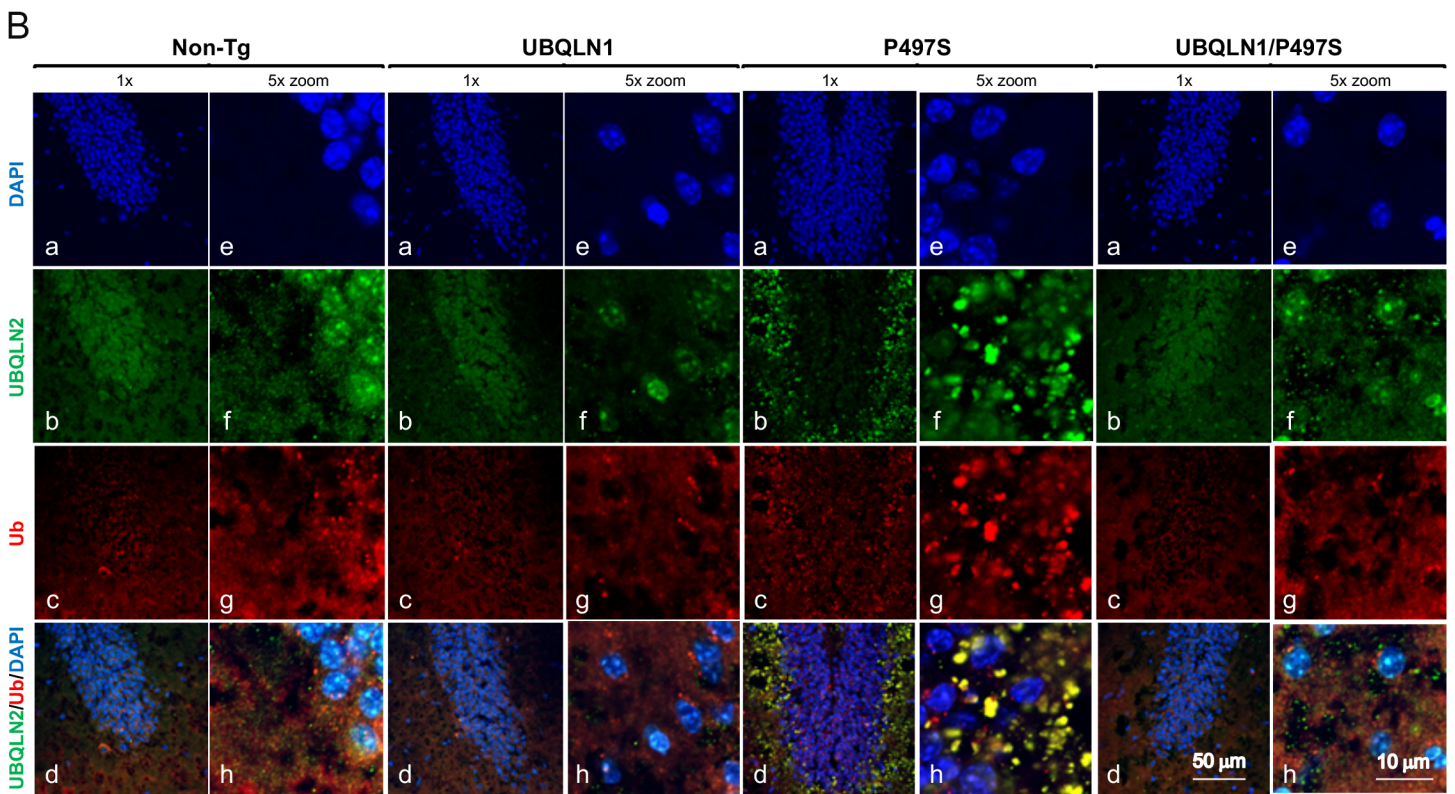

Fig S2

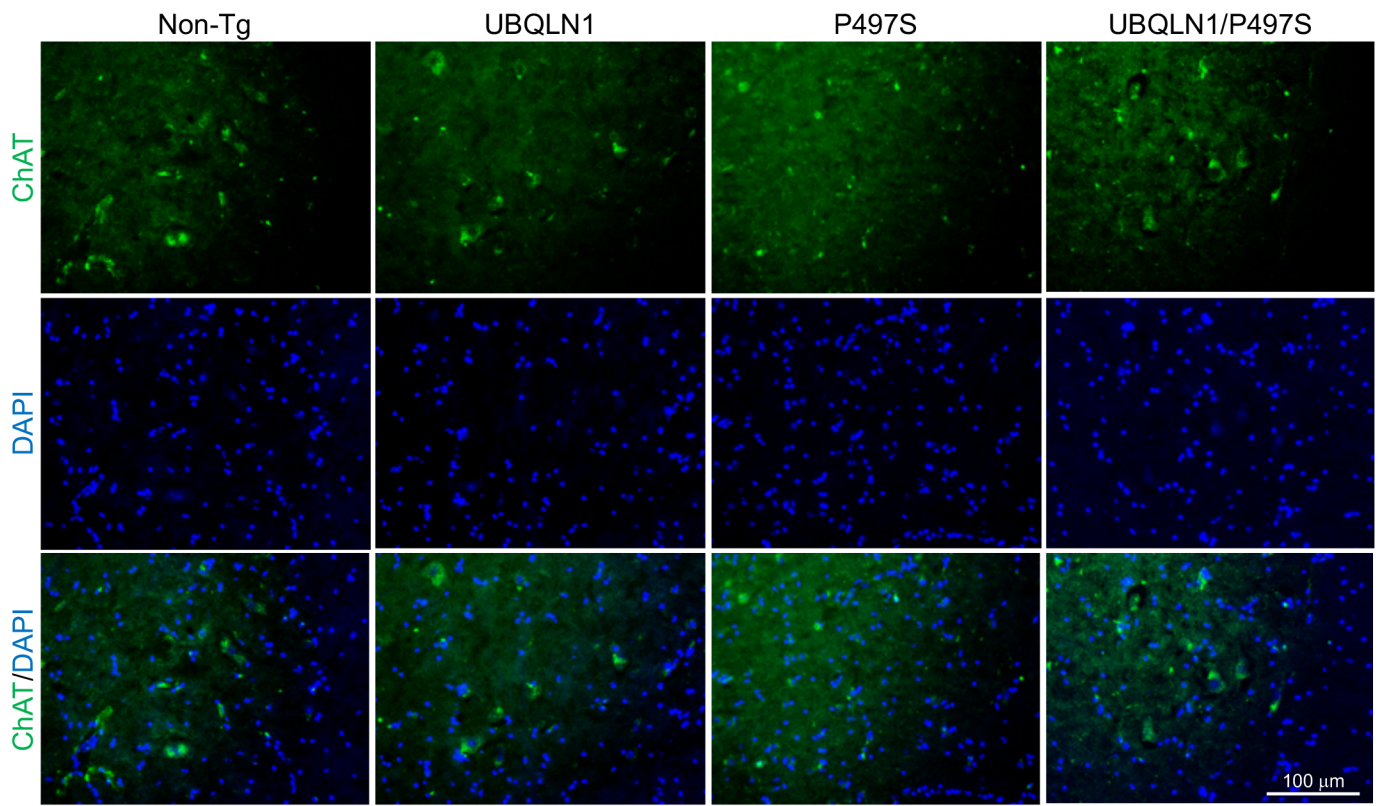

Fig S3



A

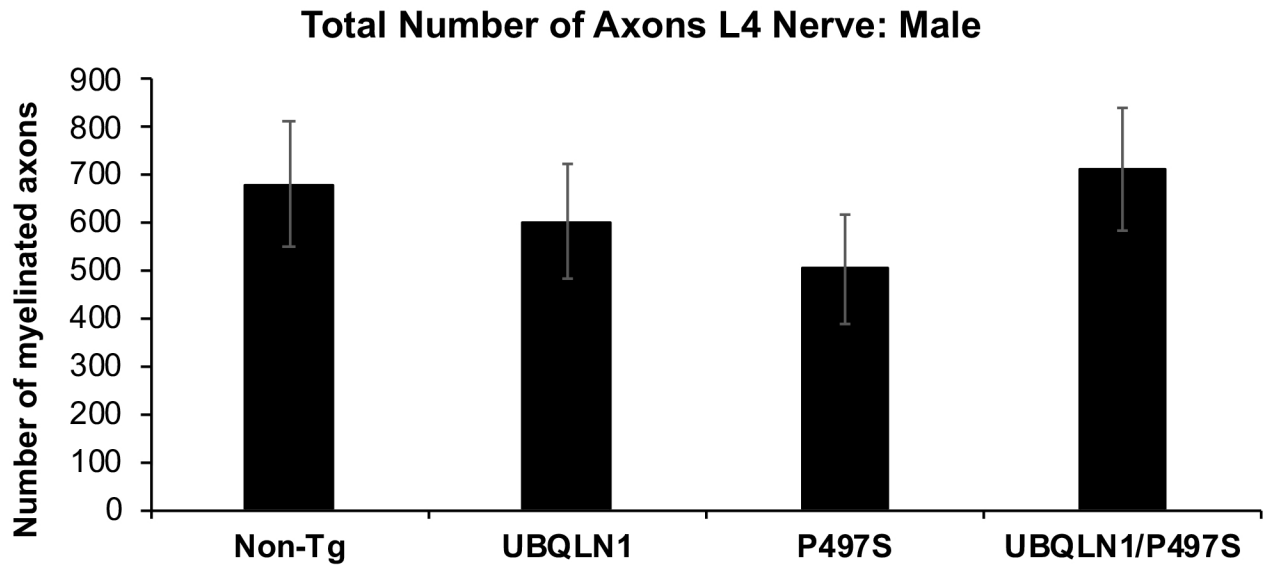

B

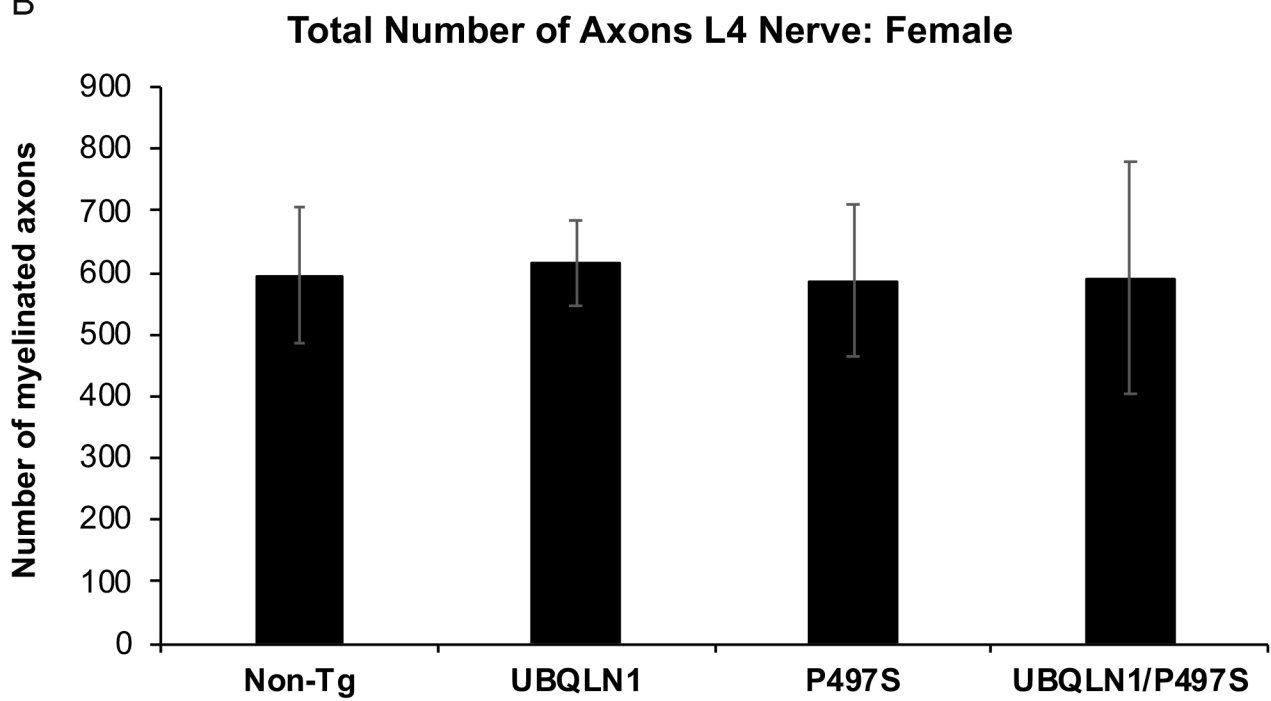

Fig S4
